# Supplementary material
Source: HighWire-hosted journal article supplement (https://bmjopen.bmj.com/content/10/12/e041981)
Supplement: inline-supplementary-material-1 [file inline-supplementary-material-1.pdf]

**search strategies for PubMed**

#1 (((((((endometrial neoplasm[Title/Abstract]) OR (cancer of the endometrium[Title/Abstract])) OR (carcinoma of the endometrium[Title/Abstract])) OR (endometrial cancer[Title/Abstract])) OR (endometrial carcinoma[Title/Abstract])) OR (endometrium cancer[Title/Abstract])) OR (endometrium carcinoma[Title/Abstract]))

#2 (((((hysteroscopy[Title/Abstract]) OR (hysteroscopic surgery[Title/Abstract])) OR (uterine endoscopy[Title/Abstract])) OR (uteroscopy[Title/Abstract])) OR (diagnostic hysteroscopy[Title/Abstract])) OR (hysteroscopic surgical procedure[Title/Abstract])

#3 ("1900/01/01"[Date - Publication] : "2020/07/30"[Date - Publication])

#4 #1 and #2 and #3
